# Supplementary material
Source: Springer Nature journal article supplement (https://www.springerprofessional.de/resource/supplementary/13638_2013_856_MOESM12_ESM.pdf/11899094)

SNR = 6dB

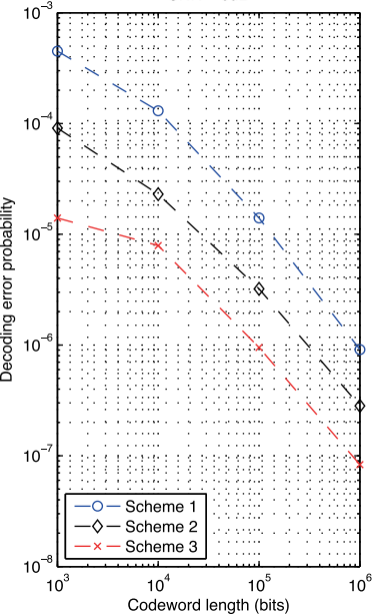

SNR = 2dB

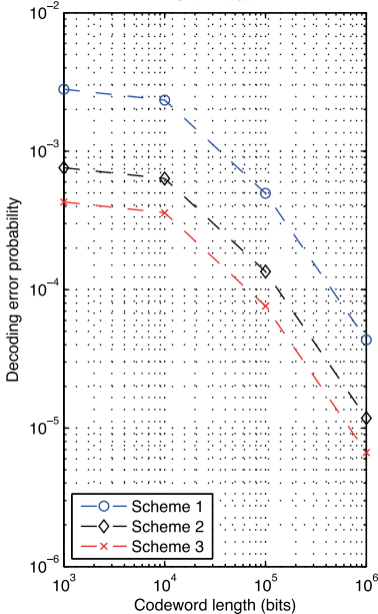

Supplement: MOESM12 [file 11899094]
